# Supplementary material for: Bioinformatic-based approach for mutagenesis of plant immune Tm-22 receptor to confer resistance against tomato brown rugose fruit virus (ToBRFV)
Source: Front Plant Sci. 2022 Sep 30;13:984846. doi: 10.3389/fpls.2022.984846 (PMC9562835; doi:10.3389/fpls.2022.984846)
Supplement: Supplementary file 2 [file Table_1.xlsx]

## Sheet: Non Bonded Contacts
MP ToBRFV		Tm-22		Distance (A)
Residue Name	Residue Number	Residue Name	Residue Number
SER	179	ALA	54	3.48
SER	179	ALA	54	3.79
THR	181	LYS	55	3.39
THR	181	LYS	55	3.46
THR	181	LYS	55	2.76
THR	181	LYS	55	3.69
SER	179	ALA	57	3.08
SER	179	ALA	57	3.12
SER	179	ALA	57	3.4
SER	179	GLY	58	3.02
SER	179	GLY	58	3.05
GLY	184	GLY	58	3.85
GLY	184	GLY	58	3.52
PRO	185	GLY	58	3.88
GLY	184	GLY	59	3.77
GLY	184	GLY	59	3.21
GLY	184	GLY	59	3.45
PRO	185	GLY	59	3.42
PRO	185	GLY	59	3.45
PRO	185	GLY	59	3.7
PRO	185	GLY	59	3.22
PRO	185	GLY	59	3.24
THR	181	ASP	60	3.86
THR	181	ASP	60	3.46
THR	181	ASP	60	3.24
ASP	182	ASP	60	3.86
GLY	184	ASP	60	3.68
GLY	183	SER	61	3.86
GLY	183	SER	61	3.15
PRO	185	SER	61	3.69
GLU	187	LYS	64	3.7
GLU	187	LYS	64	3.45
GLU	187	LYS	64	3.46
GLU	187	LYS	64	2.63
LYS	113	ASP	162	3.76
LYS	113	ASP	162	3.28
LYS	113	ASP	162	3.41
LYS	113	ASP	162	2.73
THR	109	MET	166	3.53
THR	109	MET	166	3.18
ALA	110	MET	166	3.47
ALA	110	MET	166	3.49
ALA	112	MET	166	3.74
ASN	82	LYS	170	3.59
ASN	82	LYS	170	2.74
CYS	83	LYS	170	2.73
ALA	111	LYS	170	3.59
ALA	111	LYS	170	2.92
ALA	112	LYS	170	3.88
ARG	84	HIS	177	3.56
ARG	84	HIS	177	3.48
ARG	84	HIS	177	3.47
ARG	84	HIS	177	2.84
ARG	84	HIS	177	3.84
ARG	84	HIS	177	3.38
ARG	84	HIS	177	3.61
VAL	200	MET	186	3.84
GLU	199	ARG	291	3.84
GLU	199	ARG	291	3.88
PRO	201	SER	293	3.84
PRO	201	SER	293	3.15
ARG	205	ARG	297	3.43
GLY	85	GLU	302	3.64
GLY	85	GLU	302	3.61
GLY	86	GLU	302	3.06
GLY	86	GLU	302	3.86
ARG	143	GLU	302	3.53
ARG	143	GLU	302	3.57
ARG	143	GLU	302	3.16
ARG	143	GLU	302	3.48
ARG	143	GLU	302	3.55
ARG	143	GLU	302	3.78
ARG	143	GLU	302	3.44
ARG	143	GLU	302	3.53
ARG	143	GLU	302	3.8
ASN	144	GLU	302	3.6
ARG	84	SER	303	3.88
ARG	84	SER	303	3.82
ARG	84	SER	303	3.87
ARG	84	SER	303	3.56
GLY	85	SER	303	3.27
GLY	85	SER	303	3.5
GLY	85	SER	303	2.95
GLY	85	SER	303	3.74
GLY	85	SER	303	3.29
GLY	85	SER	303	3.89
GLY	85	SER	303	3.7
ASN	144	SER	303	3.72
ASN	144	SER	303	3.78
ASN	144	SER	303	3.27
ASN	144	SER	303	3.38
ASN	144	SER	303	2.71
ARG	84	SER	304	3.24
ARG	143	LEU	305	3.28
ARG	143	LEU	305	3.78
ARG	143	LEU	305	2.9
ARG	143	LEU	305	3.67
ARG	143	LEU	305	3.47
ARG	143	LEU	305	3.62
ARG	143	LEU	305	2.82
ALA	110	HIS	306	3.66
ALA	110	HIS	306	3.44
TYR	108	ALA	307	3.67
TYR	108	ALA	307	3.6
TYR	108	ALA	307	3.39
TYR	108	ALA	307	3.76
TYR	108	ALA	307	3.43
TYR	108	ALA	307	3.71
TYR	108	ALA	307	3.67
TYR	108	LEU	308	3.83
SER	106	GLN	309	3.4
SER	106	GLN	309	3.55
SER	106	GLN	309	3.63
SER	106	GLN	309	3.5
SER	106	GLN	309	3.58
SER	106	GLN	309	3.08
SER	106	GLN	309	3.42
SER	106	GLN	309	3.89
SER	106	GLN	309	3.52
SER	106	GLN	309	3.86
SER	106	GLN	309	3.14
SER	106	GLN	309	3.68
TYR	107	GLN	309	3.84
TYR	107	GLN	309	3.62
TYR	107	GLN	309	3.51
TYR	107	GLN	309	3.66
TYR	107	GLN	309	3.87
TYR	107	GLN	309	3.71
TYR	108	GLN	309	3.61
TYR	108	GLN	309	3.66
TYR	108	GLN	309	3.55
ALA	105	PRO	310	3.38
SER	106	PRO	310	3.83
SER	106	PRO	310	3.2
SER	106	PRO	310	3.34
LYS	119	LEU	311	3.88
LYS	119	LEU	311	3.29
GLN	117	GLU	312	3.28
GLN	117	GLU	312	3.61
GLN	117	GLU	312	2.84
PHE	118	GLU	312	3.57
PHE	118	GLU	312	3.76
LYS	119	GLU	312	3.36
LYS	119	GLU	312	3.07
LYS	119	GLU	312	3.79
LYS	119	GLU	312	3.77
LYS	119	GLU	312	2.91
LYS	119	GLU	312	3.24
LYS	119	GLU	312	3.85
PHE	13	SER	313	3.88
PHE	13	SER	313	3.54
PHE	13	SER	313	3.52
LYS	119	SER	313	3.75
LYS	119	SER	313	3.6
LYS	119	SER	313	3.2
LYS	119	SER	313	2.74
LYS	119	SER	313	3.87
LYS	119	SER	313	2.97
LYS	119	SER	313	3.43
LYS	119	SER	313	3.88
LYS	119	SER	313	3.1
VAL	120	SER	313	3.74
VAL	120	SER	313	3.79
VAL	120	SER	313	3.63
VAL	121	SER	313	3.85
VAL	121	SER	313	3.52
LYS	119	GLU	314	3.83
LYS	119	GLU	314	3.5
LYS	119	GLU	314	3.55
LYS	119	GLU	314	3.84
LYS	119	GLU	314	3.29
LYS	119	GLU	314	2.61
GLU	12	PHE	317	3.84
GLU	12	PHE	317	3.52
GLU	12	PHE	317	3.75
GLU	12	PHE	317	3.8
GLU	12	PHE	317	3.87
GLU	12	PHE	317	3.79
LYS	18	SER	337	3.79
LYS	18	SER	337	3.39
LYS	18	SER	337	2.75
ASP	15	ASP	339	3.5
LEU	16	ASP	339	3.77
SER	17	ASP	339	3.89
SER	17	ASP	339	3.15
SER	17	ASP	339	3.37
SER	17	ASP	339	3.2
LYS	18	ASP	339	3.66
LYS	18	ASP	339	2.68
LYS	18	ASP	339	3.75
LYS	18	ASP	339	3.7
LYS	18	ASP	339	3.85
LYS	18	ASP	339	3.59
LYS	18	ASP	339	3.48
LYS	18	ASP	339	3.54
LYS	18	ASP	339	3.71
LYS	18	ASP	339	3.12
LYS	18	ASP	339	3.5
LYS	18	ASP	339	3.56
ASN	11	ASN	342	3.67
ASN	11	ASN	342	3.54
ASN	11	ASN	342	3.44
ASN	11	ASN	342	3.75
ASN	11	ASN	342	3.58
ASN	11	ASN	342	3.88
ASN	11	ASN	342	3.84
ASN	11	ASN	342	3.8
ASN	11	ASN	342	3.55
ASN	11	ASN	342	3.28
ASN	11	ASN	342	3
ILE	14	ASN	342	3.72
ILE	14	ASN	342	3.66
ILE	14	ASN	342	3.79
ILE	14	ASN	342	3.43
ASP	15	ASN	342	3.59
ASP	15	ASN	342	3.69
ASP	15	ASN	342	3.87
ASP	15	ASN	342	3.51
ASP	15	ASN	342	3.68
ASP	15	ASN	342	3.81
LEU	16	ASN	342	3.57
LEU	16	ASN	342	3.66
LEU	16	ASN	342	3.82
LEU	16	ASN	342	3.73
ASP	15	ILE	343	3.79
ASP	15	ILE	343	3.77
ASP	15	ILE	343	3.31
ASP	15	ILE	343	3.49
ASP	15	ILE	343	3.23
ARG	174	ILE	343	3.84
ARG	174	ILE	343	3.25
ASN	11	ARG	345	3.84
ASN	11	ARG	345	3.3
ASN	11	ARG	345	3.5
ASN	11	ARG	345	3.4
ASN	11	ARG	345	3.06
ASN	11	ARG	345	3.75
ASN	11	ARG	345	3.7
ASN	11	ARG	345	2.9
ASN	11	ARG	345	3.18
GLU	12	ARG	345	3.79
GLU	12	ARG	345	3.44
GLU	12	ARG	345	3.8
GLU	12	ARG	345	3.88
GLU	12	ARG	345	3.88
GLU	12	ARG	345	3.78
GLU	12	ARG	345	3.75
ASP	15	ASN	346	3.66
ASP	15	ASN	346	3.56
ASP	15	ASN	346	3.34
VAL	121	GLY	349	3.86
VAL	121	GLY	349	3.01
VAL	121	GLY	349	3.54
VAL	121	GLY	349	3.79
VAL	121	GLY	349	3.19
VAL	121	GLY	349	3.6
VAL	121	GLY	349	3.82
VAL	121	GLY	349	3.33
ASN	123	GLY	349	3.35
ASN	123	GLY	349	2.82
HIS	67	ARG	350	3.32
HIS	67	ARG	350	3.57
ASN	123	ARG	350	3.8
ASN	123	ARG	350	3.79
ASN	123	ARG	350	3.28
ASN	123	ARG	350	3.81
ASN	123	ARG	350	2.88
ASN	123	ARG	350	3.53
ASN	123	ARG	350	3.45
VAL	121	GLY	352	3.64
VAL	121	GLY	352	3.87
VAL	121	GLY	352	3.71
VAL	121	GLY	353	3.14
VAL	121	GLY	353	3.8
ARG	174	TRP	375	3.49
ARG	174	TRP	375	2.73
ARG	174	ASN	376	3.65
ARG	174	ASN	376	3.8
ARG	174	ASN	376	3.16
ARG	174	ASN	376	3.77
ARG	174	ASN	376	3.76
ARG	174	ASN	376	3.89
ARG	174	ASN	376	3.52
ARG	174	ASN	376	3.51
ARG	174	ASN	376	2.75
ARG	174	ASN	376	3.65
ARG	174	ASN	376	3.71
ARG	174	ASN	376	3.84
ARG	174	ASN	376	3.59
ARG	174	ASN	376	3.46
ARG	174	ASN	376	3.7
ARG	174	ASN	376	3.18
ARG	174	ASN	376	3.55
ARG	174	ASN	376	3.32
ARG	174	LEU	379	3.87
ARG	174	LEU	379	3.6
ARG	174	LEU	379	3.34
ARG	174	LEU	379	3.75
ARG	174	LEU	379	3.2
ARG	174	LEU	379	3.52
ARG	174	LEU	379	3.76
GLU	175	LEU	379	3.88
GLU	175	LEU	379	3.66
GLU	175	LEU	379	3.17
ARG	174	GLU	380	3.59
ARG	174	GLU	380	3.29
ARG	174	GLU	380	3.77
ARG	174	GLU	380	3.24
GLU	175	GLU	380	3.57
GLU	175	GLU	380	3.64
GLU	175	GLU	380	3.69
GLU	175	GLU	380	3.58
GLU	175	GLU	380	3.86
GLU	175	GLU	380	3.69
GLU	175	GLU	380	3.37
GLU	175	GLU	380	3.89
GLU	175	GLU	380	3.44
GLU	175	GLU	380	3.5
LYS	176	GLU	380	3.54
LYS	176	GLU	380	3.51
LYS	176	GLU	380	2.74
LYS	176	GLU	380	3.55
LYS	176	GLU	380	3.55
LYS	176	GLU	380	3.28
LYS	176	GLU	380	3.66
LYS	176	GLU	380	3.35
LYS	176	GLU	380	3.77
LYS	176	GLU	380	3.57
GLU	175	SER	381	3.48
GLU	175	SER	381	3.63
GLU	175	SER	381	3.68
LYS	176	SER	381	3.26
LYS	176	SER	381	3.44
LYS	176	SER	381	3.34
GLU	175	MET	382	2.83
GLU	175	MET	382	3.69
GLU	175	MET	382	3.67
GLU	175	GLY	383	3.53
GLU	175	GLY	383	3.6
GLU	175	GLY	383	3.68
GLU	175	GLY	383	2.84
GLU	175	GLY	383	3.66
HIS	67	HIS	384	3.61
ASN	123	HIS	384	3.85
ASN	123	HIS	384	2.89
ASN	123	HIS	384	3.9
ASN	125	HIS	384	3.86
ASN	125	HIS	384	3.38
ASN	125	HIS	384	3.55
ASN	125	HIS	384	3.15
ASN	125	HIS	384	3.41
ASN	125	HIS	384	3.17
TYR	165	HIS	384	3.21
TYR	165	HIS	384	2.97
ILE	168	HIS	384	3.6
ILE	168	HIS	384	3.61
ILE	168	HIS	384	3.53
LEU	171	HIS	384	3.38
LEU	171	HIS	384	3.54
ASN	123	LYS	385	3.42
TYR	124	LYS	385	3.73
TYR	124	LYS	385	3.76
TYR	124	LYS	385	3.55
ASN	125	LYS	385	3.89
PRO	122	VAL	386	3.6
PRO	122	VAL	386	3.79
PRO	122	VAL	386	3.34
ASN	123	VAL	386	3.87
ASN	123	VAL	386	3.7
GLU	101	GLN	387	3.19
GLU	101	GLN	387	3.31
GLU	101	GLN	387	3.15
GLU	101	GLN	387	2.74
ALA	102	GLN	387	3.71
ALA	102	GLN	387	3.87
ALA	102	GLN	387	3.46
ALA	102	GLN	387	3.8
THR	103	GLN	387	3.46
THR	103	GLN	387	3.13
THR	103	GLN	387	3.61
THR	103	GLN	387	3.68
THR	103	GLN	387	2.83
LEU	104	GLN	387	3.52
LEU	104	GLN	387	3.89
LEU	104	GLN	387	3.71
LEU	104	GLN	387	3.87
LEU	104	GLN	387	3.67
LEU	104	GLN	387	3.83
VAL	193	ASP	388	3.72
VAL	193	ASP	388	3.64
VAL	193	ASP	388	3.53
VAL	193	ASP	388	3.47
MET	186	LYS	392	3.19
LEU	188	LYS	392	3.59
LYS	176	LEU	396	3.18
LYS	176	ASN	399	3.77
LYS	176	ASN	399	3.12

## Sheet: Hydrogen Bonds
MP ToBRFV		Tm-22		Distance (A)
Residue Name	Residue Number	Residue Name	Residue Number
THR	181	LYS	55	2.76
GLU	187	LYS	64	2.63
LYS	113	ASP	162	2.73
CYS	83	LYS	170	2.73
ASN	82	LYS	170	2.74
ALA	111	LYS	170	2.92
ARG	84	HIS	177	2.84
GLY	86	GLU	302	3.06
ASN	144	SER	303	2.71
GLY	85	SER	303	2.95
ARG	84	SER	304	3.24
ARG	143	LEU	305	2.82
ARG	143	LEU	305	2.9
LYS	119	SER	313	2.74
LYS	119	GLU	314	2.61
LYS	18	SER	337	2.75
LYS	18	ASP	339	2.68
ASN	11	ASN	342	3
ASN	11	ARG	345	2.9
ASN	123	GLY	349	2.82
ASN	123	ARG	350	2.88
ARG	174	TRP	375	2.73
ARG	174	ASN	376	2.75
LYS	176	GLU	380	2.74
LYS	176	SER	381	3.34
GLU	175	MET	382	2.83
GLU	175	GLY	383	2.84
TYR	165	HIS	384	2.97
GLU	101	GLN	387	2.74
THR	103	GLN	387	2.83
MET	186	LYS	392	3.19
LYS	176	ASN	399	3.12

## Sheet: Salt Bridges
MP ToBRFV		Tm-22		Distance (A)
Residue Name	Residue Number	Residue Name	Residue Number
GLU	12	ARG	345	3.75
LYS	18	ASP	339	3.56
LYS	113	ASP	162	2.73
LYS	119	GLU	314	2.61
GLU	187	LYS	64	2.63
ARG	205	GLU	302	3.94
